# Supplementary material for: Optimization of sampling and monitoring of vegetative flushing in citrus orchards
Source: PLoS One. 2020 May 20;15(5):e0233014. doi: 10.1371/journal.pone.0233014 (PMC7239491; doi:10.1371/journal.pone.0233014)
Supplement: S1 Appendix — (XLSX) [file pone.0233014.s001.xlsx]

## Sheet: Avg. shoots
Date	All plants	Transect1	Transect2	Transect3	Transect4	Transect5	Transect6	Transect7	Transect8
2016-03-02	2.03901	3.09375	1.59375	1.5	1.84375	2.1875	2.23333	1.25	1.34375
2016-03-23	1.92908	2.3125	1.59375	2.4375	1.4375	2.09375	1.76667	1.4375	1.78125
2016-04-13	0.904255	1.125	0.4375	1.1875	0.71875	1.15625	0.866667	1.03125	0.5625
2016-05-04	0.656028	0.15625	0.71875	0.40625	1.09375	0.4375	0.733333	0.5	0.40625
2016-05-25	0.812057	0.90625	0.375	0.75	1.125	0.21875	0.933333	0.71875	0.84375
2016-06-15	3.83688	5.84375	2.03125	4.3125	3.34375	4.375	2.7	4.03125	3.9375
2016-07-05	4.55674	5.4375	4	4.78125	4.0625	4.6875	2.86667	5.09375	5.125
2016-07-27	3.30496	2.78125	3.5625	3.5	3.625	4.03125	3.76667	3.40625	3.53125
2016-08-17	1.39716	1.0625	1.34375	1.40625	2	1.15625	2.33333	1.59375	1.21875
2016-09-07	3.83333	5.78125	2.8125	4.875	3.15625	4.15625	3.93333	4.8125	3.5625
2016-09-28	2.32979	3.53125	1.4375	2.75	2.34375	2.53125	2	2.6875	2.34375
2016-10-19	6.67376	10.625	6.625	6.53125	5.34375	6.0625	6.8	6.28125	5.53125
2016-11-09	4.92908	2.4375	5.78125	5.3125	5.90625	4.875	5.86667	4.59375	4.5
2016-11-30	0.329787	0.1875	0.125	0.59375	0.3125	0.46875	0.2	0.375	0.625
2016-12-21	0.404255	0.21875	0.40625	0.28125	0.6875	0.21875	0.7	0.65625	0.3125
2017-01-11	2.06738	3.53125	2.28125	1.75	1.5625	2.15625	2.2	2.71875	1.875
2017-02-01	4.28014	4.40625	4.125	4.03125	4.53125	4.65625	4.33333	4.15625	4.21875
2017-02-22	1.46454	1.96875	0.3125	1.3125	1.75	1.40625	1.03333	1.21875	1.53125
General Average	2.54157	3.07812	2.19792	2.65104	2.49132	2.60417	2.51481	2.58681	2.40278
		21.1113	13.5212	4.30732	1.97708	2.46299	1.05263	1.7799	5.46082
			10.2292				2.68908

## Sheet: Transect I
		L1	L2	L3	L4	L5	L6	L7	L8	L9	L10	L11	L12
	P1
	P2
	P3			121						41	1
	P4				82					42
	P5			123	83					43
	P6				84					44	4
	P7			125	85					45	5
	P8			126	86					46	6
	P9			127	87					47	7
	P10			128	88					48	8
	P11				89					49	9
	P12			130	90					50	10
	P13			131	91					51	11
	P14			132	92					52	12
	P15			133	93					53	13
	P16			134	94						14
	P17			135	95						15
	P18			136	96					56
	P19			137	97					57
	P20			138	98					58	18
	P21			139	99					59	19
	P22			140	100					60	20
	P23			141	101					61	21
	P24			142	102					62	22
	P25				103					63	23
	P26			144	104					64
	P27				105						25
	P28			146	106					66
	P29			147	107					67	27
	P30			148	108					68	28
	P31			149	109					69	29
	P32			150	110					70	30
	P33			151	111					71	31
	P34			152	112					72	32
	P35				113					73	33
	P36			154	114					74
	P37			155	115					75	35
	P38				116					76	36
	P39			157	117					77	37
	P40			158	118						38
	P41			159	119					79	39
	P42			160	120					80	40
	P43			172	171					167	161
	P44			173						168
	P45										162
	P46			174						169	163
	P47									170
	P48			175
	P49										164
	P50			176							165
	P51			177
	P52			178							166
	P53
	P54										179
	P55
	P56
	P57
	P58
	P59
	P60
	P61
	P62
	P63
	P64
	P65
	P66

## Sheet: Transect II
		L12	L11	L10	L9	L8	L7	L6	L5	L4	L3	L2	L1
	P1
	P2
	P3			121						41	1			1
	P4				82					42				2
	P5			123	83					43				3
	P6				84					44	4			4
	P7			125	85					45	5			5
	P8			126	86					46	6			6
	P9			127	87					47	7			7
	P10			128	88					48	8			8
	P11				89					49	9			9
	P12			130	90					50	10			10
	P13			131	91					51	11			11
	P14			132	92					52	12			12
	P15			133	93					53	13			13
	P16			134	94						14			14
	P17			135	95						15			15
	P18			136	96					56				16
	P19			137	97					57				17
	P20			138	98					58	18			18
	P21			139	99					59	19			19
	P22			140	100					60	20			20
	P23			141	101					61	21			21
	P24			142	102					62	22			22
	P25				103					63	23			23
	P26			144	104					64				24
	P27				105						25			25
	P28			146	106					66				26
	P29			147	107					67	27			27
	P30			148	108					68	28			28
	P31			149	109					69	29			29
	P32			150	110					70	30			30
	P33			151	111					71	31			31
	P34			152	112					72	32			32
	P35				113					73	33			33
	P36			154	114					74				34
	P37			155	115					75	35			35
	P38				116					76	36			36
	P39			157	117					77	37			37
	P40			158	118						38			38
	P41			159	119					79	39			39
	P42			160	120					80	40			40
	P43			172	171					167	161			41
	P44			173						168				42
	P45										162			43
	P46			174						169	163			44
	P47									170				45
	P48			175										46
	P49										164			47
	P50			176							165			48
	P51			177										49
	P52			178							166			50
	P53													51
	P54										179			52
	P55
	P56
	P57
	P58
	P59
	P60
	P61
	P62
	P63
	P64
	P65
	P66

## Sheet: Transect III
		L1	L2	L3	L4	L5	L6	L7	L8	L9	L10	L11	L12
	P1
	P2
	P3			121						41	1
	P4				82					42
	P5			123	83					43
	P6				84					44	4
	P7			125	85					45	5
	P8			126	86					46	6
	P9			127	87					47	7
	P10			128	88					48	8
	P11				89					49	9
	P12			130	90					50	10
	P13			131	91					51	11
	P14			132	92					52	12
	P15			133	93					53	13
	P16			134	94						14
	P17			135	95						15
	P18			136	96					56
	P19			137	97					57
	P20			138	98					58	18
	P21			139	99					59	19
	P22			140	100					60	20
	P23			141	101					61	21
	P24			142	102					62	22
	P25				103					63	23
	P26			144	104					64
	P27				105						25
	P28			146	106					66
	P29			147	107					67	27
	P30			148	108					68	28
	P31			149	109					69	29
	P32			150	110					70	30
	P33			151	111					71	31
	P34			152	112					72	32
	P35				113					73	33
	P36			154	114					74
	P37			155	115					75	35
	P38				116					76	36
	P39			157	117					77	37
	P40			158	118						38
	P41			159	119					79	39
	P42			160	120					80	40
	P43			172	171					167	161
	P44			173						168
	P45										162
	P46			174						169	163
	P47									170
	P48			175
	P49										164
	P50			176							165
	P51			177
	P52			178							166
	P53
	P54										179
	P55
	P56
	P57
	P58
	P59
	P60
	P61
	P62
	P63
	P64
	P65
	P66

## Sheet: Transect IV
		L12	L11	L10	L9	L8	L7	L6	L5	L4	L3	L2	L1
	P1
	P2
	P3			121						41	1
	P4				82					42
	P5			123	83					43
	P6				84					44	4
	P7			125	85					45	5
	P8			126	86					46	6
	P9			127	87					47	7
	P10			128	88					48	8
	P11				89					49	9
	P12			130	90					50	10
	P13			131	91					51	11
	P14			132	92					52	12
	P15			133	93					53	13
	P16			134	94						14
	P17			135	95						15
	P18			136	96					56
	P19			137	97					57
	P20			138	98					58	18
	P21			139	99					59	19
	P22			140	100					60	20
	P23			141	101					61	21
	P24			142	102					62	22
	P25				103					63	23
	P26			144	104					64
	P27				105						25
	P28			146	106					66
	P29			147	107					67	27
	P30			148	108					68	28
	P31			149	109					69	29
	P32			150	110					70	30
	P33			151	111					71	31
	P34			152	112					72	32
	P35				113					73	33
	P36			154	114					74
	P37			155	115					75	35
	P38				116					76	36
	P39			157	117					77	37
	P40			158	118						38
	P41			159	119					79	39
	P42			160	120					80	40
	P43			172	171					167	161
	P44			173						168
	P45										162
	P46			174						169	163
	P47									170
	P48			175
	P49										164
	P50			176							165
	P51			177
	P52			178							166
	P53
	P54										179
	P55
	P56
	P57
	P58
	P59
	P60
	P61
	P62
	P63
	P64
	P65
	P66

## Sheet: Transect V
		L1	L2	L3	L4	L5	L6	L7	L8	L9	L10	L11	L12
	P1
	P2
	P3			121						41	1
	P4				82					42
	P5			123	83					43
	P6				84					44	4
	P7			125	85					45	5
	P8			126	86					46	6
	P9			127	87					47	7
	P10			128	88					48	8
	P11				89					49	9
	P12			130	90					50	10
	P13			131	91					51	11
	P14			132	92					52	12
	P15			133	93					53	13
	P16			134	94						14
	P17			135	95						15
	P18			136	96					56
	P19			137	97					57
	P20			138	98					58	18
	P21			139	99					59	19
	P22			140	100					60	20
	P23			141	101					61	21
	P24			142	102					62	22
	P25				103					63	23
	P26			144	104					64
	P27				105						25
	P28			146	106					66
	P29			147	107					67	27
	P30			148	108					68	28
	P31			149	109					69	29
	P32			150	110					70	30
	P33			151	111					71	31
	P34			152	112					72	32
	P35				113					73	33
	P36			154	114					74
	P37			155	115					75	35
	P38				116					76	36
	P39			157	117					77	37
	P40			158	118						38
	P41			159	119					79	39
	P42			160	120					80	40
	P43			172	171					167	161
	P44			173						168
	P45										162
	P46			174						169	163
	P47									170
	P48			175
	P49										164
	P50			176							165
	P51			177
	P52			178							166
	P53
	P54										179
	P55
	P56
	P57
	P58
	P59
	P60
	P61
	P62
	P63
	P64
	P65
	P66

## Sheet: Transect VI
		L12	L11	L10	L9	L8	L7	L6	L5	L4	L3	L2	L1
	P1
	P2
	P3			121						41	1
	P4				82					42
	P5			123	83					43
	P6				84					44	4
	P7			125	85					45	5
	P8			126	86					46	6
	P9			127	87					47	7
	P10			128	88					48	8
	P11				89					49	9
	P12			130	90					50	10
	P13			131	91					51	11
	P14			132	92					52	12
	P15			133	93					53	13
	P16			134	94						14
	P17			135	95						15
	P18			136	96					56
	P19			137	97					57
	P20			138	98					58	18
	P21			139	99					59	19
	P22			140	100					60	20
	P23			141	101					61	21
	P24			142	102					62	22
	P25				103					63	23
	P26			144	104					64
	P27				105						25
	P28			146	106					66
	P29			147	107					67	27
	P30			148	108					68	28
	P31			149	109					69	29
	P32			150	110					70	30
	P33			151	111					71	31
	P34			152	112					72	32
	P35				113					73	33
	P36			154	114					74
	P37			155	115					75	35
	P38				116					76	36
	P39			157	117					77	37
	P40			158	118						38
	P41			159	119					79	39
	P42			160	120					80	40
	P43			172	171					167	161
	P44			173						168
	P45										162
	P46			174						169	163
	P47									170
	P48			175
	P49										164
	P50			176							165
	P51			177
	P52			178							166
	P53
	P54										179
	P55
	P56
	P57
	P58
	P59
	P60
	P61
	P62
	P63
	P64
	P65
	P66

## Sheet: Transect VII
		L12	L11	L10	L9	L8	L7	L6	L5	L4	L3	L2	L1
	P1
	P2
	P3			121						41	1
	P4				82					42
	P5			123	83					43
	P6				84					44	4
	P7			125	85					45	5
	P8			126	86					46	6
	P9			127	87					47	7
	P10			128	88					48	8
	P11				89					49	9
	P12			130	90					50	10
	P13			131	91					51	11
	P14			132	92					52	12
	P15			133	93					53	13
	P16			134	94						14
	P17			135	95						15
	P18			136	96					56
	P19			137	97					57
	P20			138	98					58	18
	P21			139	99					59	19
	P22			140	100					60	20
	P23			141	101					61	21
	P24			142	102					62	22
	P25				103					63	23
	P26			144	104					64
	P27				105						25
	P28			146	106					66
	P29			147	107					67	27
	P30			148	108					68	28
	P31			149	109					69	29
	P32			150	110					70	30
	P33			151	111					71	31
	P34			152	112					72	32
	P35				113					73	33
	P36			154	114					74
	P37			155	115					75	35
	P38				116					76	36
	P39			157	117					77	37
	P40			158	118						38
	P41			159	119					79	39
	P42			160	120					80	40
	P43			172	171					167	161
	P44			173						168
	P45										162
	P46			174						169	163
	P47									170
	P48			175
	P49										161
	P50			176							165
	P51			177
	P52			178							166
	P53
	P54										179
	P55
	P56
	P57
	P58
	P59
	P60
	P61
	P62
	P63
	P64
	P65
	P66

## Sheet: Transect VIII
		L12	L11	L10	L9	L8	L7	L6	L5	L4	L3	L2	L1
	P1
	P2
	P3			121						41	1
	P4				82					42
	P5			123	83					43
	P6				84					44	4
	P7			125	85					45	5
	P8			126	86					46	6
	P9			127	87					47	7
	P10			128	88					48	8
	P11				89					49	9
	P12			130	90					50	10
	P13			131	91					51	11
	P14			132	92					52	12
	P15			133	93					53	13
	P16			134	94						14
	P17			135	95						15
	P18			136	96					56
	P19			137	97					57
	P20			138	98					58	18
	P21			139	99					59	19
	P22			140	100					60	20
	P23			141	101					61	21
	P24			142	102					62	22
	P25				103					63	23
	P26			144	104					64
	P27				105						25
	P28			146	106					66
	P29			147	107					67	27
	P30			148	108					68	28
	P31			149	109					69	29
	P32			150	110					70	30
	P33			151	111					71	31
	P34			152	112					72	32
	P35				113					73	33
	P36			154	114					74
	P37			155	115					75	35
	P38				116					76	36
	P39			157	117					77	37
	P40			158	118						38
	P41			159	119					79	39
	P42			160	120					80	40
	P43			172	171					167	161
	P44			173						168
	P45										162
	P46			174						169	163
	P47									170
	P48			175
	P49										164
	P50			176							165
	P51			177
	P52			178							166
	P53
	P54										179
	P55
	P56
	P57
	P58
	P59
	P60
	P61
	P62
	P63
	P64
	P65
	P66
